# Supplementary material for: Lactated Ringer’s Solution Reduces Severity, Mortality, Systemic and Local Complications in Acute Pancreatitis: A Systematic Review and Meta-Analysis
Source: MDPI journal article supplement (doi:10.3390/biomedicines11020321), 2023-01-23
Supplement: s1 [file s1]

|                               | Outcome      | D1 | D2 | D3 | D4 | D5 | Overall |
|-------------------------------|--------------|----|----|----|----|----|---------|
| de-Madaria et al. (2017)      | MSAP         | +  | +  | +  | +  | +  | +       |
| Lee et al. (2021)             | MSAP         | +  | +  | +  | +  | +  | +       |
| Kayhan et al. (2021)          | MSAP         | +  | !  | +  | !  | !  | !       |
| Choosakul et al. (2018)       | mortality    | +  | +  | +  | +  | +  | +       |
| de-Madaria et al. (2017)      | mortality    | +  | +  | +  | +  | +  | +       |
| Karki et al. (2022)           | mortality    | +  | +  | +  | +  | +  | +       |
| Lee et al. (2021)             | mortality    | +  | +  | +  | +  | +  | +       |
| Wu et al. (2011)              | mortality    | +  | +  | +  | +  | +  | +       |
| Choosakul et al. (2018)       | LoH          | +  | +  | +  | +  | +  | +       |
| de-Madaria et al. (2017)      | LoH          | +  | +  | +  | +  | +  | +       |
| Karki et al. (2022)           | LoH          | +  | +  | +  | +  | +  | +       |
| Lee et al. (2021)             | LoH          | +  | +  | +  | +  | +  | +       |
| Wu et al. (2011)              | LoH          | +  | +  | +  | +  | +  | +       |
| Farrell et al. (2022)         | LoH          | +  | +  | +  | +  | +  | +       |
| Kayhan et al. (2021)          | LoH          | +  | !  | +  | +  | !  | !       |
| Reddy/vasudevan et al. (2014) | LoH          | !  | -  | !  | +  | !  | -       |
| de-Madaria et al. (2017)      | ICU          | +  | +  | +  | +  | +  | +       |
| Lee et al. (2021)             | ICU          | +  | +  | +  | +  | +  | +       |
| Wu et al. (2011)              | ICU          | +  | +  | +  | +  | +  | +       |
| Reddy/Vasudevan et al. (2014) | ICU          | !  | -  | +  | !  | !  | -       |
| Choosakul et al. (2018)       | OF           | +  | +  | +  | +  | +  | +       |
| de-Madaria et al. (2017)      | OF           | +  | +  | +  | +  | +  | +       |
| Lee et al. (2021)             | OF           | +  | +  | +  | +  | +  | +       |
| Wu et al. (2011)              | OF           | +  | +  | +  | !  | +  | !       |
| Kayhan et al. (2021)          | OF           | +  | !  | +  | +  | !  | !       |
| Reddy/Vasudevan et al. (2014) | OF           | !  | -  | +  | !  | !  | -       |
| Choosakul et al. (2018)       | Local compl. | +  | +  | +  | +  | +  | +       |
| Karki et al. (2022)           | Local compl. | +  | +  | +  | +  | +  | +       |
| Lee et al. (2021)             | Local compl. | +  | +  | +  | +  | +  | +       |
| Kayhan et al. (2021)          | Local compl. | +  | !  | +  | +  | !  | !       |
| Choosakul et al. (2018)       | Necrosis     | +  | +  | +  | +  | +  | +       |
| de-Madaria et al. (2017)      | Necrosis     | +  | +  | +  | +  | +  | +       |
| Karki et al. (2022)           | Necrosis     | +  | +  | +  | +  | +  | +       |
| Wu et al. (2011)              | Necrosis     | +  | +  | +  | +  | +  | +       |
| Farrell et al. (2022)         | Necrosis     | +  | +  | +  | +  | +  | +       |
| Kayhan et al. (2021)          | Necrosis     | +  | !  | +  | +  | !  | !       |
| Reddy/vasudevan et al. (2014) | Necrosis     | !  | -  | !  | +  | !  | -       |
| Choosakul et al. (2018)       | Pseudocyst   | +  | +  | +  | +  | +  | +       |
| Karki et al. (2022)           | Pseudocyst   | +  | +  | +  | +  | +  | +       |
| Farrell et al. (2022)         | Pseudocyst   | +  | +  | +  | +  | +  | +       |
| Choosakul et al. (2018)       | CRP          | +  | +  | +  | -  | +  | -       |
| de-Madaria et al. (2017)      | CRP          | +  | +  | +  | +  | +  | +       |
| Wu et al. (2011)              | CRP          | +  | +  | +  | +  | !  | !       |
| Farrell et al. (2022)         | CRP          | +  | +  | +  | +  | +  | +       |
| Kayhan et al. (2021)          | CRP          | +  | !  | +  | +  | !  | !       |
| Choosakul et al. (2018)       | SIRS         | +  | +  | +  | +  | +  | +       |
| de-Madaria et al. (2017)      | SIRS         | +  | +  | +  | +  | +  | +       |
| Karki et al. (2022)           | SIRS         | +  | +  | +  | +  | +  | +       |

 Low risk  
 Some concerns  
 High risk

D1 Randomisation process

D2 Deviations from the intended interventions

**Figure S1.** Results of risk of bias assessment with RoB2 tool. MSAP: moderate-to-severe acute pancreatitis; LoH: length of hospitalization; ICU: intensive care unite admission; OF: organ failure; CRP: C-reactive protein; SIRS: systemic inflammatory response syndrome.

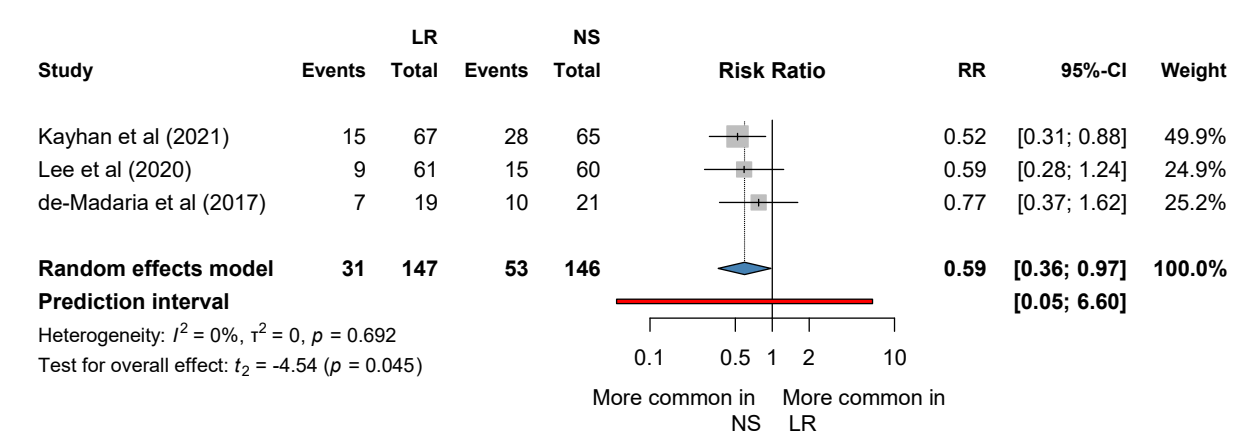

**Figure S2.** Moderate-to-severe acute pancreatitis. Statistical heterogeneity across trials was assessed by means of the Cochrane Q test and the  $I^2$  values.

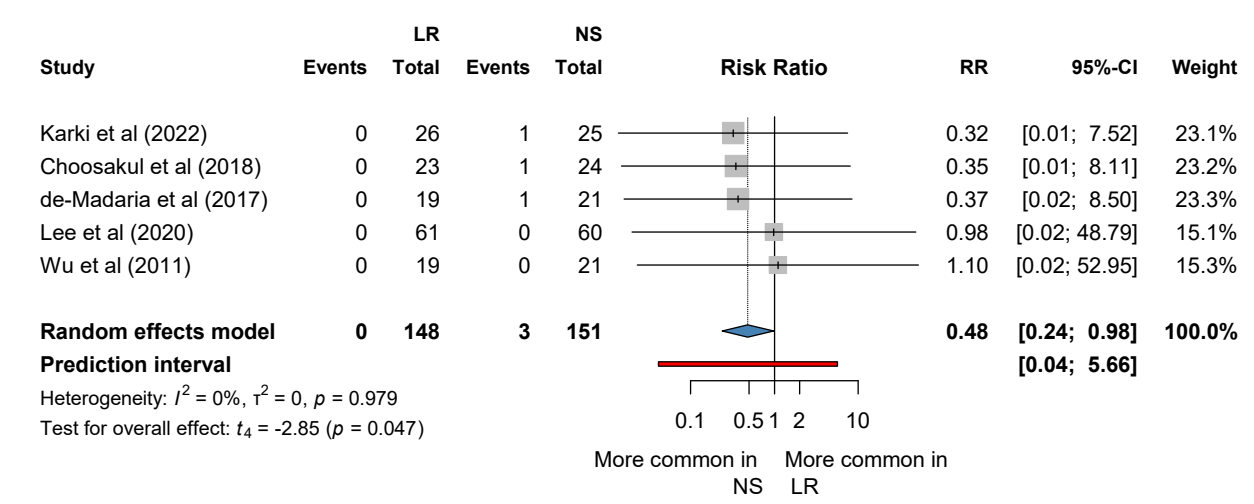

**Figure S3.** In-hospital mortality. Statistical heterogeneity across trials was assessed by means of the Cochrane Q test and the  $I^2$  values.

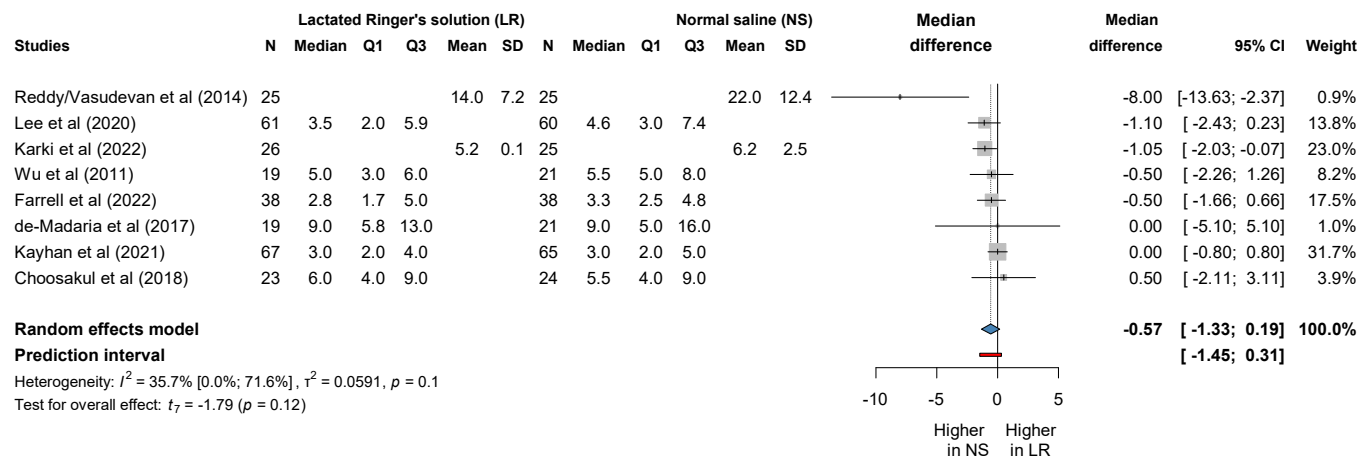

**Figure S4.** Length of hospital stay. Statistical heterogeneity across trials was assessed by means of the Cochrane Q test and the  $I^2$  values.

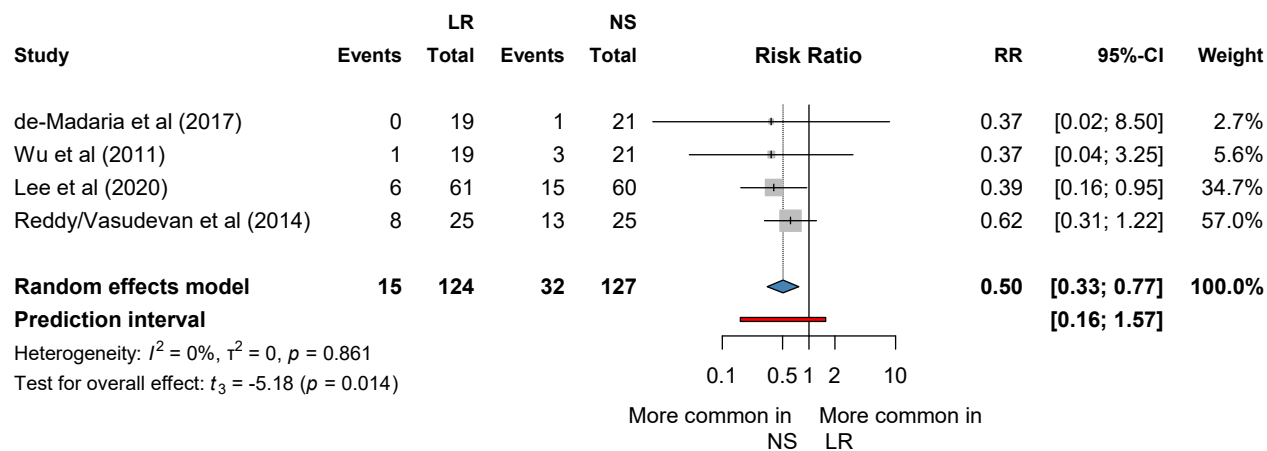

**Figure S5.** Need for intensive care. Statistical heterogeneity across trials was assessed by means of the Cochrane Q test and the  $I^2$  values.

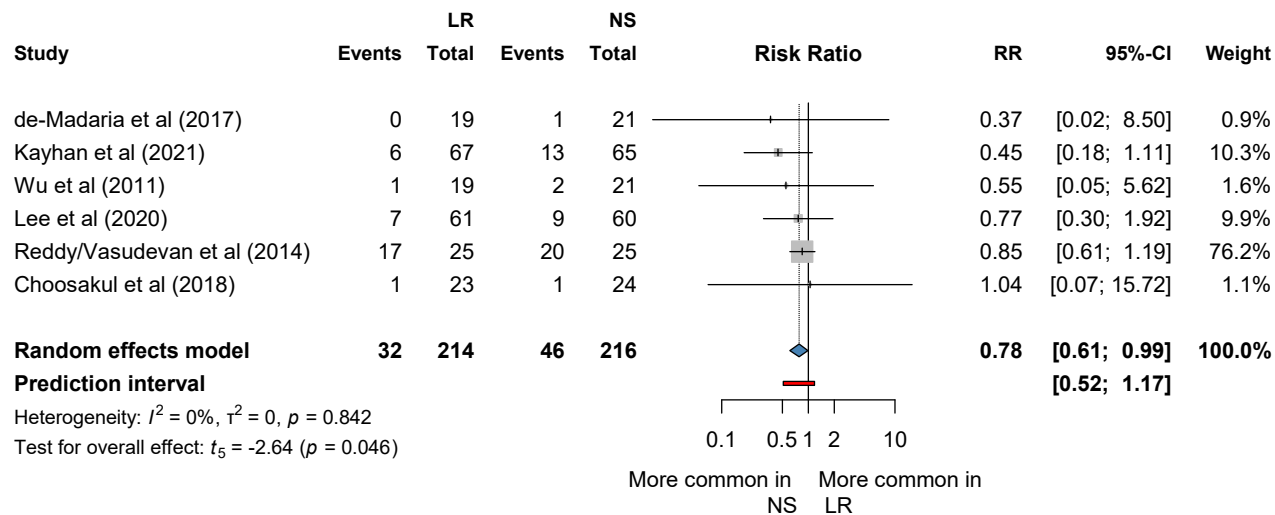

**Figure S6.** Organ failure. Statistical heterogeneity across trials was assessed by means of the Cochrane Q test and the  $I^2$  values.

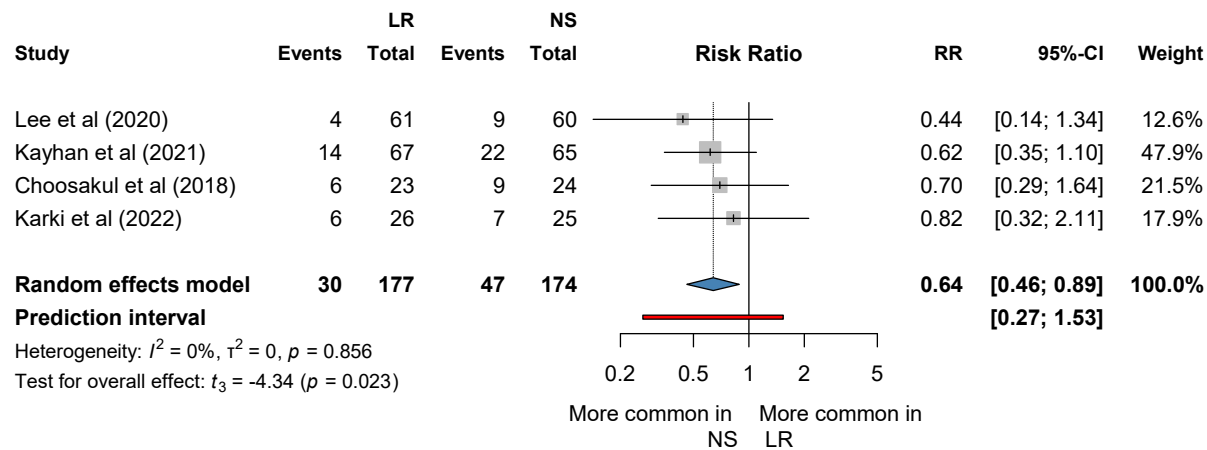

**Figure S7.** Local complications. Statistical heterogeneity across trials was assessed by means of the Cochrane Q test and the  $I^2$  values.

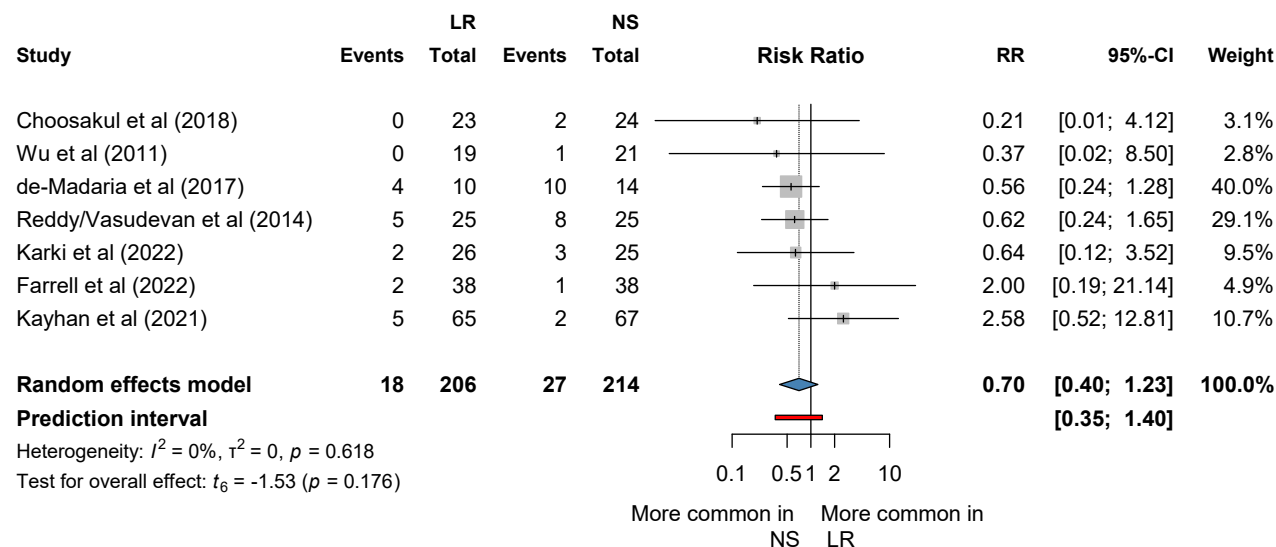

**Figure S8.** Necrosis. Statistical heterogeneity across trials was assessed by means of the Cochrane Q test and the  $I^2$  values.

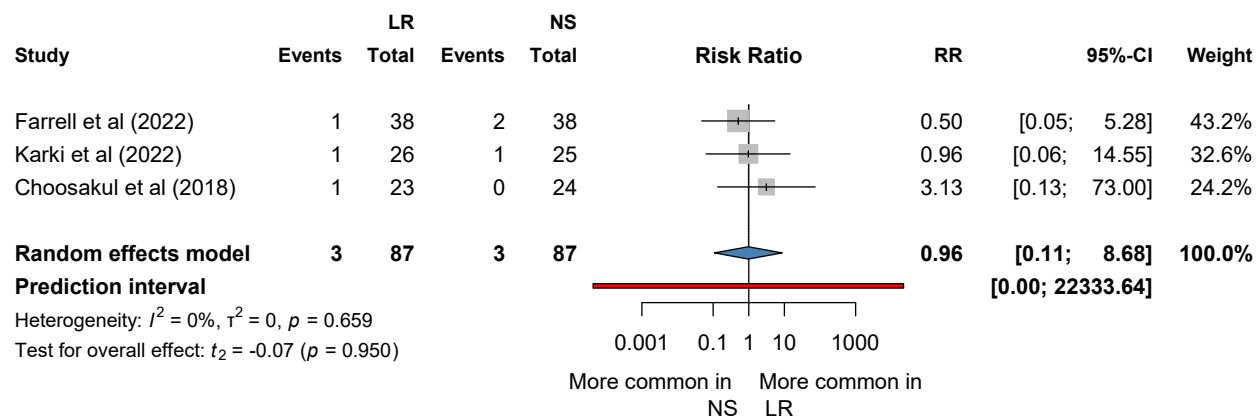

**Figure S9.** Pseudocyst. Statistical heterogeneity across trials was assessed by means of the Cochrane Q test and the  $I^2$  values.

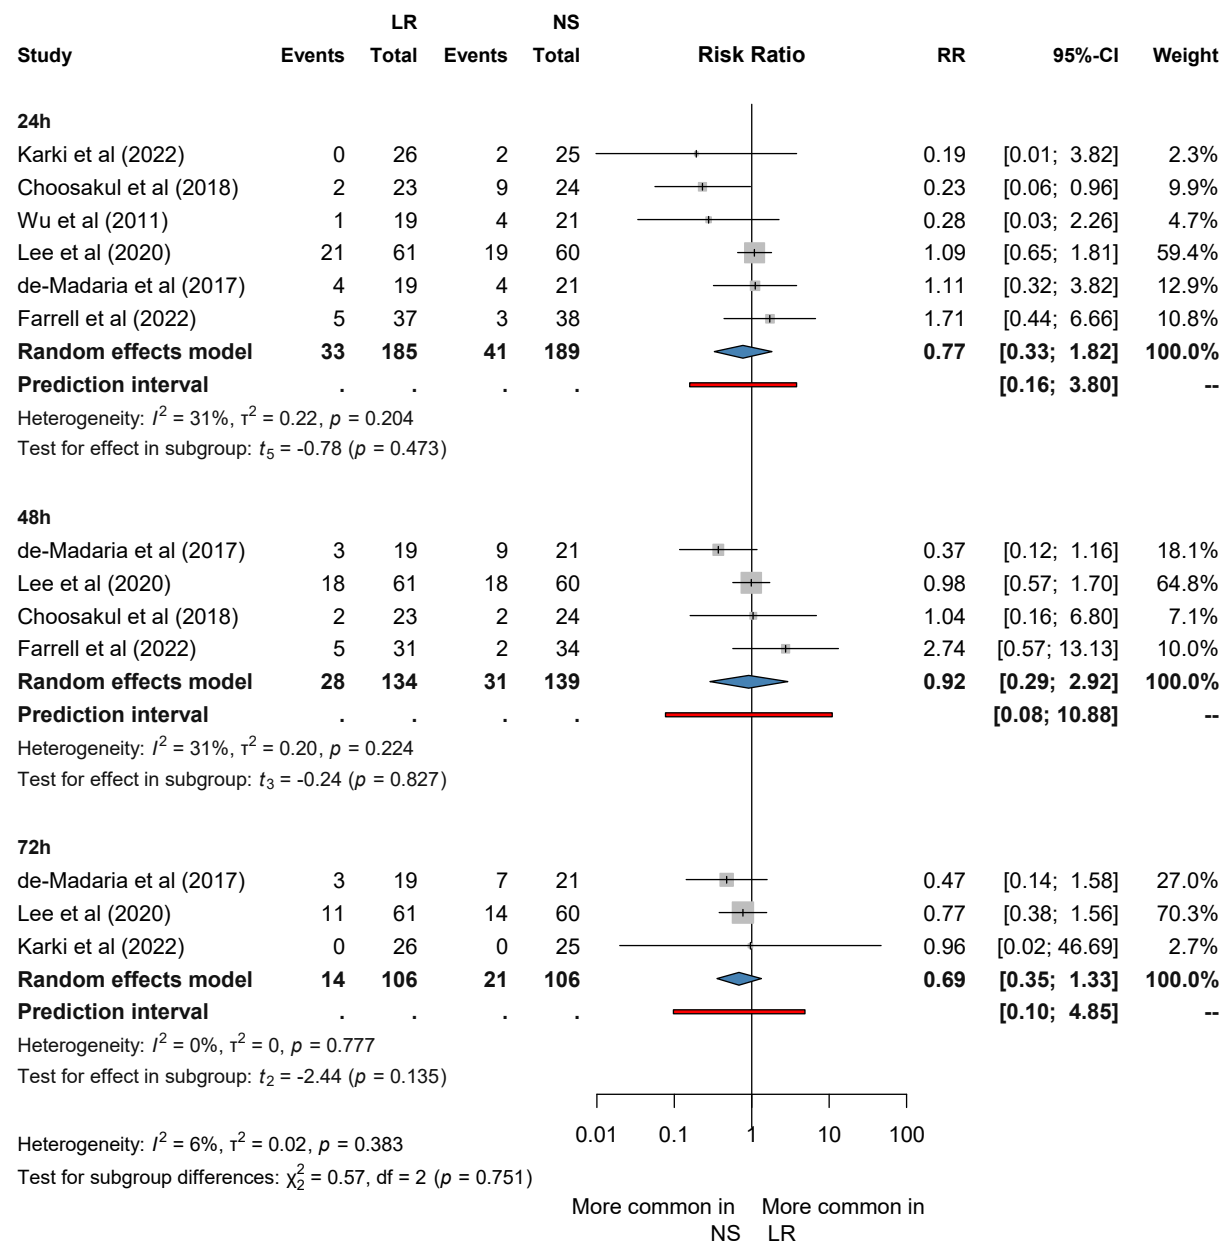

**Figure S10.** Systemic inflammatory response syndrome. Statistical heterogeneity across trials was assessed by means of the Cochrane Q test and the  $I^2$  values.



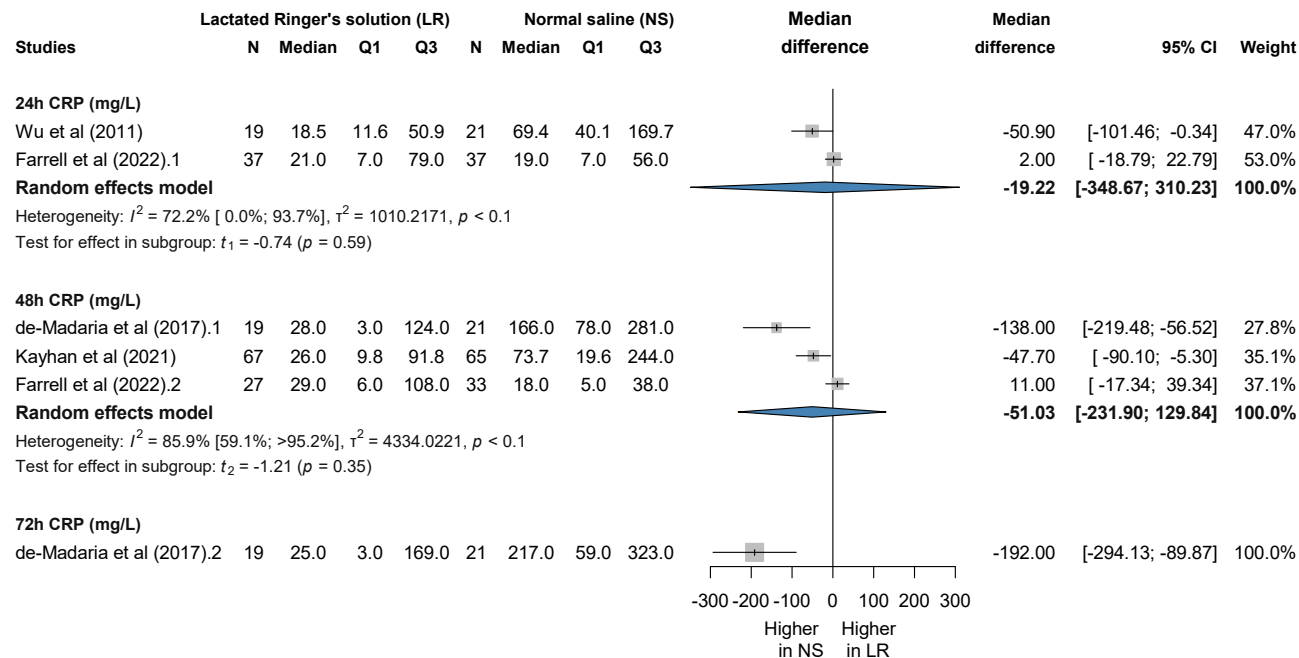

**Figure S11.** C-reactive protein levels (mg/dL) at 24, 48 and 72 h after randomization. Statistical heterogeneity across trials was assessed by means of the Cochrane Q test and the  $I^2$  values.

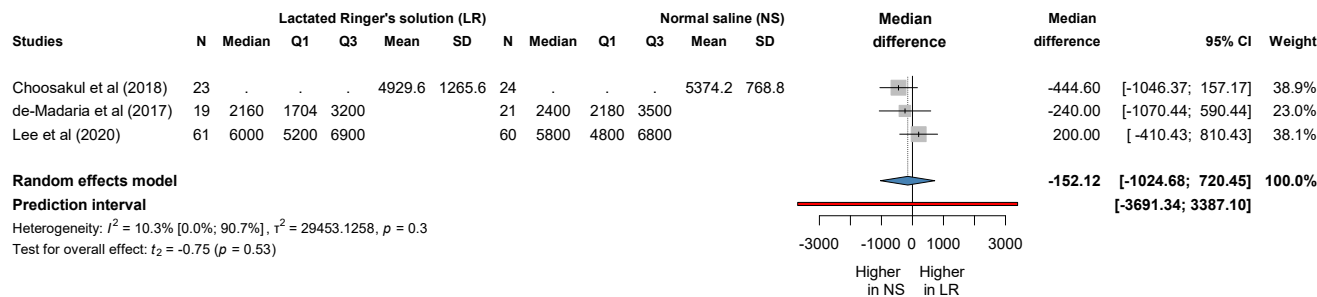

**Figure S12.** Amount of fluid administered in the first 24 h after randomization. Statistical heterogeneity across trials was assessed by means of the Cochrane Q test and the  $I^2$  values.





|                     |     |                           |             |             |                           |      |                |                |                        |                                                 |                      |                            |
|---------------------|-----|---------------------------|-------------|-------------|---------------------------|------|----------------|----------------|------------------------|-------------------------------------------------|----------------------|----------------------------|
| 6                   | RCT | very serious <sup>c</sup> | not serious | not serious | not serious               | none | 32/214 (15.0%) | 46/216 (21.3%) | RR 0.78 (0.61 to 0.99) | 47 fewer per 1 000 (from 83 fewer to 2 fewer)   | ⊕⊕○<br>○<br>Low      | critical                   |
| Local complications |     |                           |             |             |                           |      |                |                |                        |                                                 |                      |                            |
| 4                   | RCT | not serious <sup>g</sup>  | not serious | not serious | serious <sup>h</sup>      | none | 30/177 (16.9%) | 47/174 (27.0%) | RR 0.64 (0.46 to 0.89) | 97 fewer per 1 000 (from 146 fewer to 30 fewer) | ⊕⊕⊕<br>○<br>Moderate | critical                   |
| Necrosis            |     |                           |             |             |                           |      |                |                |                        |                                                 |                      |                            |
| 7                   | RCT | very serious <sup>i</sup> | not serious | not serious | not serious               | none | 16/206 (7.8%)  | 28/214 (13.1%) | RR 0.70 (0.40 to 1.23) | 39 fewer per 1 000 (from 79 fewer to 30 more)   | ⊕⊕○<br>○<br>Low      | critical                   |
| Pseudocyst          |     |                           |             |             |                           |      |                |                |                        |                                                 |                      |                            |
| 3                   | RCT | not serious <sup>i</sup>  | not serious | not serious | very serious <sup>f</sup> | none | 3/87 (3.4%)    | 3/87 (3.4%)    | RR 0.96 (0.11 to 8.68) | 1 fewer per 1 000 (from 31 fewer to 265 more)   | ⊕⊕○<br>○<br>Low      | important but not critical |

a. In our cohort, moderate plus severe cases were 29%; calculating with a 50% reduction, OIS is 121 per group.

b. Mortality rate is under 5%, therefore, considering OIS more than 500.

c. One high risk and one some concerns study.

d. Heterogeneity originates from Reddy (has a small sample size, not influential).

e. Reddy/ Vasudevan with high risk of bias produced most patients with event.

f. Considering the number of patients with event, total number of patients in analysis does not reach OIS.

- g. Half of the data comes from study with some concerns.
- h. A 13% incidence of local compl., OIS is not reached.
- i. Proportion of studies carrying high risk of bias or some concern is high.

**Table S2. References of the included studies** (as per the reference list of the manuscript).

| Ref-<br>er-<br>ence<br>Num-<br>ber | Reference                                                                                                                                                                                                                                                                                                                                                                                                                                                                                                  |
|------------------------------------|------------------------------------------------------------------------------------------------------------------------------------------------------------------------------------------------------------------------------------------------------------------------------------------------------------------------------------------------------------------------------------------------------------------------------------------------------------------------------------------------------------|
| 17.                                | Wu, B.U.; Hwang, J.Q.; Gardner, T.H.; Repas, K.; Delee, R.; Yu, S.; Smith, B.; Banks, P.A.; Conwell, D.L. Lactated Ringer's Solution Reduces Systemic Inflammation Compared with Saline in Patients with Acute Pancreatitis. <i>Clin. Gastroenterol. Hepatol.</i> 2011, 9, P710–P717.e1. <a href="https://doi.org/10.1016/j.cgh.2011.04.026">https://doi.org/10.1016/j.cgh.2011.04.026</a> .                                                                                                               |
| 30.                                | Karki, B.; Thapa, S.; Khadka, D.; Karki, S.; Shrestha, R.; Khanal, A.; Shrestha, R.; Paudel, B.N. Intravenous Ringers lactate versus normal saline for predominantly mild acute pancreatitis in a Nepalese Tertiary Hospital. <i>PLoS ONE</i> 2022, 17, e0263221. <a href="https://doi.org/10.1371/journal.pone.0263221">https://doi.org/10.1371/journal.pone.0263221</a> .                                                                                                                                |
| 31.                                | Kayhan, S.; Akyol, B.S.; Ergul, M.; Baysan, C. The effect of type of fluid on disease severity in acute pancreatitis treatment. <i>Eur. Rev. Med. Pharmacol. Sci.</i> 2021, 25, 7460–7467.                                                                                                                                                                                                                                                                                                                 |
| 42.                                | Reddy, Y.R.; Talukder, S.; Yadav, T.D.; Siddappa, P.K.; Kochhar, R. Effect of intravenous fluid resuscitation on inflammatory markers of acute pancreatitis and its clinical outcome. <i>United Eur. Gastroenterol. J.</i> 2014, 2, 132–135. <a href="https://doi.org/10.1177/2050640614548980">https://doi.org/10.1177/2050640614548980</a> .                                                                                                                                                             |
| 43.                                | Choosakul, S.; Harinwan, K.; Chirapongsathorn, S.; Opuchar, K.; Sanpajit, T.; Piyanirun, W.; Puttapitakpong, C. Comparison of normal saline versus Lactated Ringer's solution for fluid resuscitation in patients with mild acute pancreatitis, A randomized controlled trial. <i>Pancreatology</i> 2018, 18, 507–512. <a href="https://doi.org/10.1016/j.pan.2018.04.016">https://doi.org/10.1016/j.pan.2018.04.016</a> .                                                                                 |
| 44.                                | de-Madaria, E.; Herrera-Marante, I.; Gonzalez-Camacho, V.; Bonjoch, L.; Quesada-Vazquez, N.; Almenta-Saa-vedra, I.; Miralles-Macia, C.; Acevedo-Piedra, N.G.; Roger-Ibanez, M.; Sanchez-Marin, C.; et al. Fluid resuscitation with lactated Ringer's solution vs normal saline in acute pancreatitis: A triple-blind, randomized, controlled trial. <i>United Eur. Gastroenterol. J.</i> 2018, 6, 63–72. <a href="https://doi.org/10.1177/2050640617707864">https://doi.org/10.1177/2050640617707864</a> . |
| 45.                                | Lee, A.; Ko, C.; Buitrago, C.; Hiramoto, B.; Hilson, L.; Buxbaum, J.; Grp, N.-L.S. Lactated Ringers vs Normal Saline Resuscitation for Mild Acute Pancreatitis: A Randomized Trial. <i>Gastroenterology</i> 2021, 160, 955. <a href="https://doi.org/10.1053/j.gastro.2020.10.044">https://doi.org/10.1053/j.gastro.2020.10.044</a> .                                                                                                                                                                      |
| 46.                                | Vasu De Van, P.; Verma, G.R.; Bhalla, A.; Kalra, N.; Basha, J.; Appasani, S.; Chhabra, P.; Manrai, M.; Sinha, S.K.; Singh, K.; et al. Does the type of fluid used in resuscitation matter in the clinical course of acute pancreatitis? <i>Indian J. Gastroenterol.</i> 2013, 32, A110. <a href="https://doi.org/10.1007/s12664-013-0417-z">https://doi.org/10.1007/s12664-013-0417-z</a> .                                                                                                                |
| 47.                                | Farrell, P.R.; DesPain, A.W.; Farmer, P.F.; Farrell, L.M.; Greenfield, B.; Rogers, M.; Hornung, L.; Kim, E.; Pearman, R.; Neway, B.; et al. Mitigating the Inflammatory Response in Acute Pancreatitis; A Randomized Clinical Control Trial Comparing the Effects of Lactated Ringers and Normal Saline. <i>Gastroenterology</i> 2022, 162, S140–S141.                                                                                                                                                     |
